# Supplementary material for: A new fluoride selective electrochemical and fluorescent chemosensor based on a ferrocene–naphthalene dyad
Source: Royal Society of Chemistry journal article supplement (doi:10.1039/b404601c), 2004-01-01
Supplement: b404601c.pdf [file b404601c.pdf]

## **A new fluoride selective electrochemical and fluorescent chemosensor based on a ferrocene-naphthalene dyad.**

Francisco Otón, Alberto Tárraga\*, María D. Velasco, Arturo Espinosa and Pedro Molina\*,

### **Electronic Supplementary Information (ESI)**

#### **Spectroscopic data of compound 1.**

IR (CH<sub>2</sub>Cl<sub>2</sub>)  $\nu_{\max}$  3360, 3263, 1665, 1600, 1493, 1374, 1067, 1035, 852, 804, 750 cm<sup>-1</sup>.  
<sup>1</sup>H NMR (DMSO-d<sub>6</sub>):  $\delta$  = 8.48 (s, 2H, *NH*-napht.), 7.72 (m, 4H, *NH*-Fc + *H*<sub>4</sub> napht.), 7.43 (t, 2H, *J* = 7.0 Hz, *H*<sub>3</sub> napht.), 7.25 (d, 2H, *J* = 7.0 Hz, *H*<sub>2</sub> napht.), 4.89 (bs, 2H, *Fc*), 4.08 (bs, 2H, *Fc*), 3.81 (bs, 4H, *Fc*). <sup>13</sup>C NMR (DMSO-d<sub>6</sub>):  $\delta$  153.80 (C=O), 135.68 (q), 134.00 (q), 125.68 (CH), 125.17 (CH), 124.41 (CH), 97.74 (q, *Fc*), 63.27 (CH, *Fc*), 62.15 (CH, *Fc*), 60.95 (CH, *Fc*), 57.94 (CH, *Fc*). MS (EI): *m/z* (%): 426 (M<sup>+</sup>, 100), 399 (3), 268 (100), 158 (54). Anal Calcd for C<sub>22</sub>H<sub>18</sub>FeN<sub>4</sub>O<sub>2</sub>: C, 61.99; H, 4.26; N, 13.14. Found: C, 61.74; H, 4.30; N, 13.38.

**Computational details.**- Calculations were performed at the DFT level of theory, which has been widely recommended as a practical and effective tool for organometallic compounds, especially for reproducing experimental ground-state geometries and rotational barriers for ferrocenes<sup>1</sup>, and were based on the Spartan'02 (build 119, Wavefunction Inc., Irvine, CA) program system. Prior to the final DFT *ab initio*

calculation, a full conformational search was performed at the semiempirical PM3(d) level until local minima (all real frequencies) were found, as verified by harmonic frequency calculations. The obtained geometry for the  $1 \cdot 2F^-$  complex was thereafter fully optimized (Figure I) by using the B3LYP functional and the all-electron moderate size 3-21G(d) basis set.

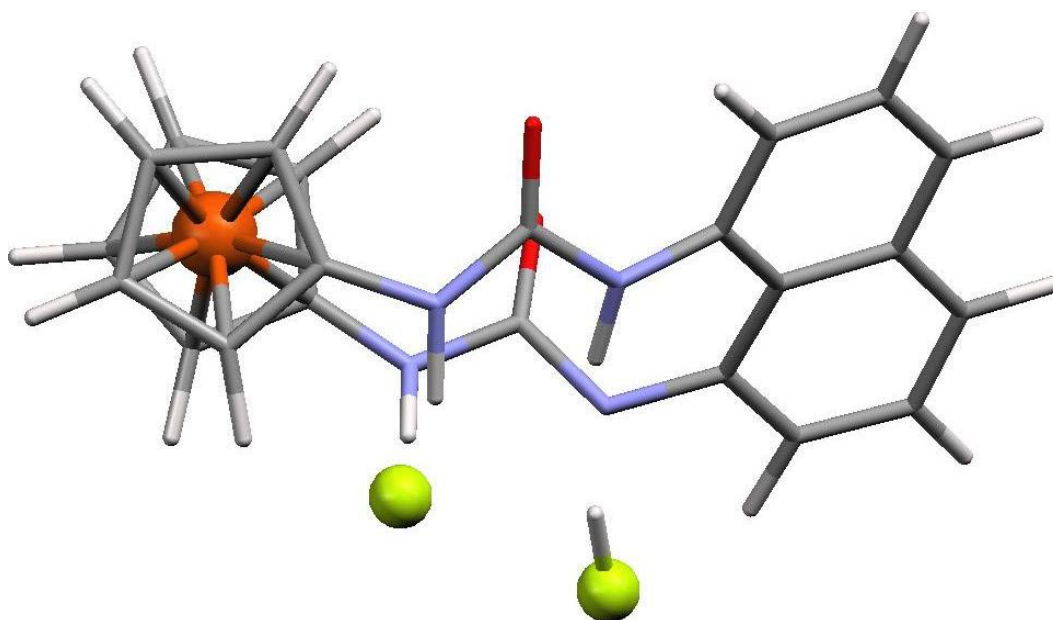

**Figure S1.** Calculated structure (B3LYP/3-21G\*) for the complex  $1 \cdot 2F^-$ . Fluorine atoms are represented as green-yellow balls.

## General Electrochemistry

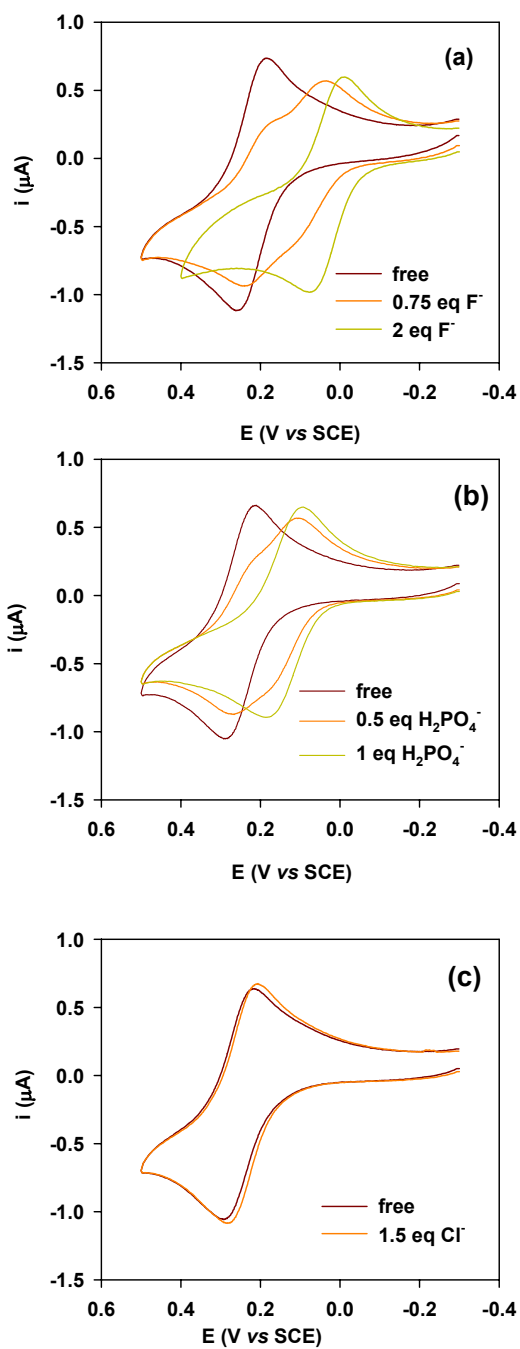

**Figure S2.** Cyclic voltammograms for the recognition of anions: Solvent : DMSO ; reference electrode : aqueous SCE; working and counter electrode: Pt; supporting electrolyte: 0.1 M [*n*-Bu<sub>4</sub>N][PF<sub>6</sub>] ; scan rate: 100 mVs<sup>-1</sup>. Samples 1 mM of **1** : (a) with [*n*-Bu<sub>4</sub>N][F] ; (b) with [*n*-Bu<sub>4</sub>N][H<sub>2</sub>PO<sub>4</sub>] and (c) with [*n*-Bu<sub>4</sub>N][Cl]

**Fluorescence:**

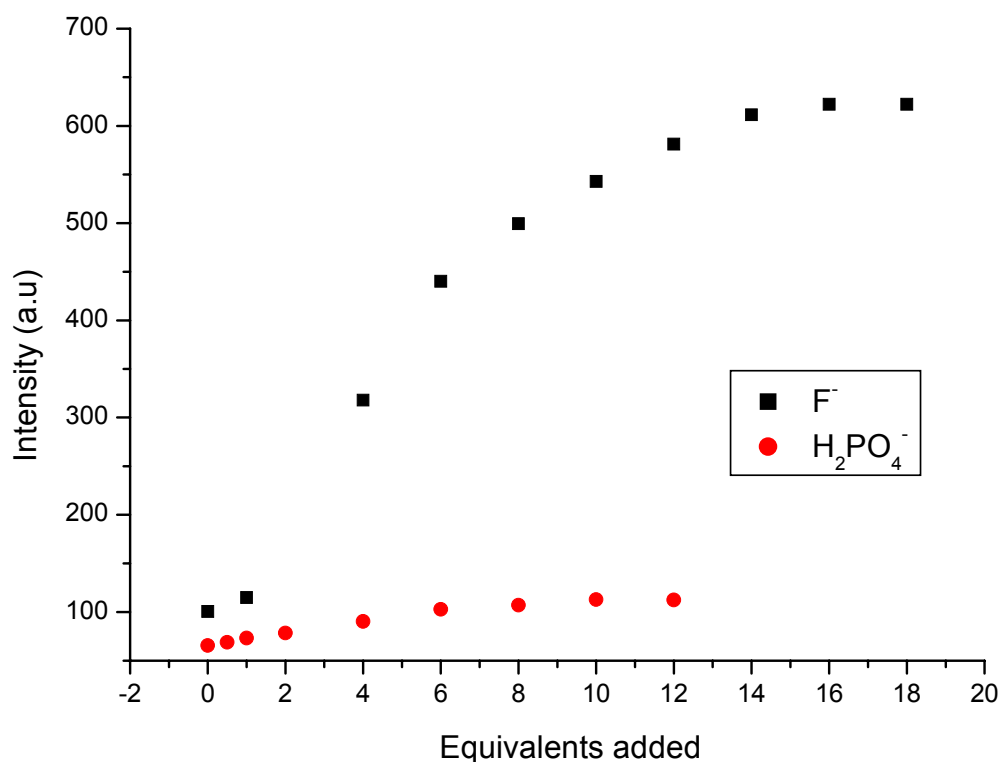

**Figure S3.** Changes in the emission spectra of **1** in the region 362-380 nm as a function of equivalents of anion added

### Evolution of the $^1\text{H}$ -NMR spectra upon addition of the appropriate anion

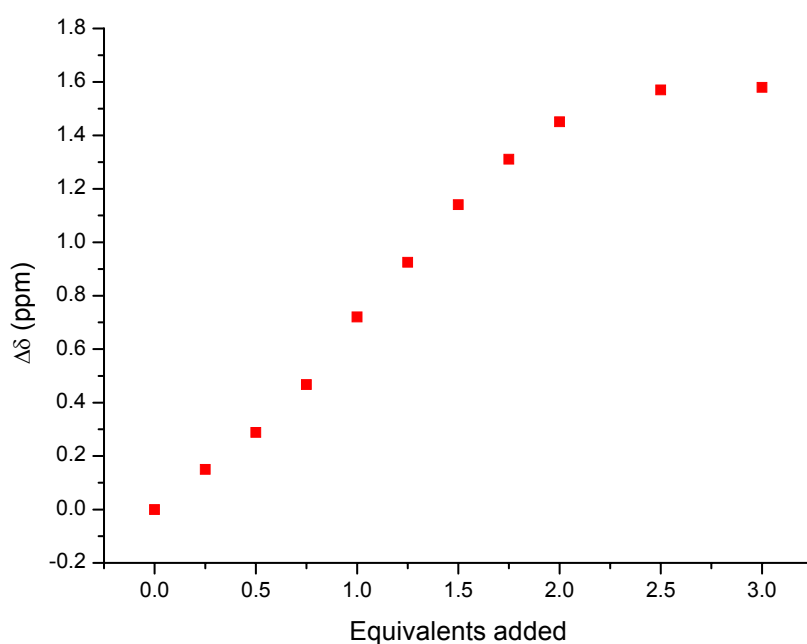

**Figure S4.** The changes  $^1\text{H}$  NMR (300 MHz,  $\text{DMSO-}d_6$ ) in NH-naphtalene protons of **1** upon titration with  $\text{F}^-$ .

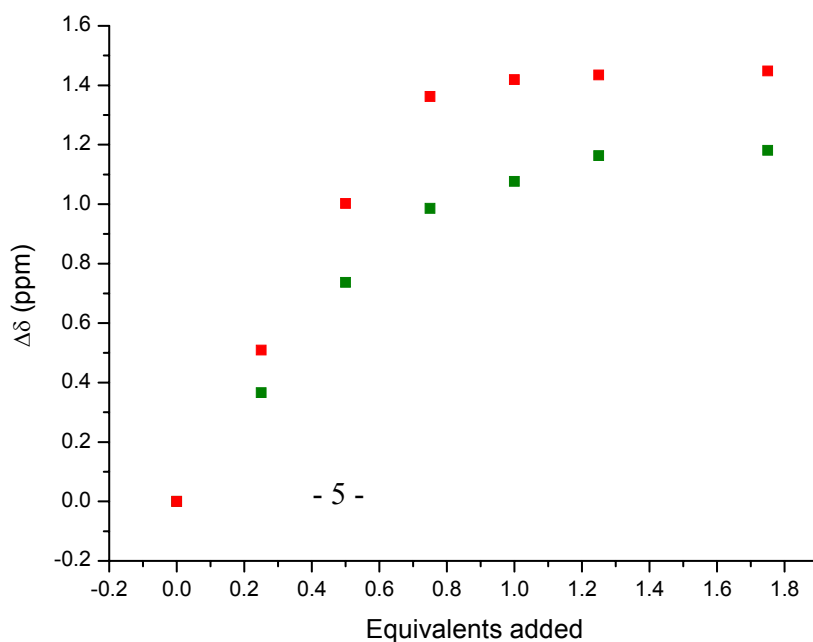

**Figure S5.** The changes  $^1\text{H}$  NMR (300 MHz,  $\text{DMSO-}d_6$ ) in NH protons of **1** upon titration with  $\text{H}_2\text{PO}_4^-$ : NH-naphtalene (red square); NH-ferrocene (green square)

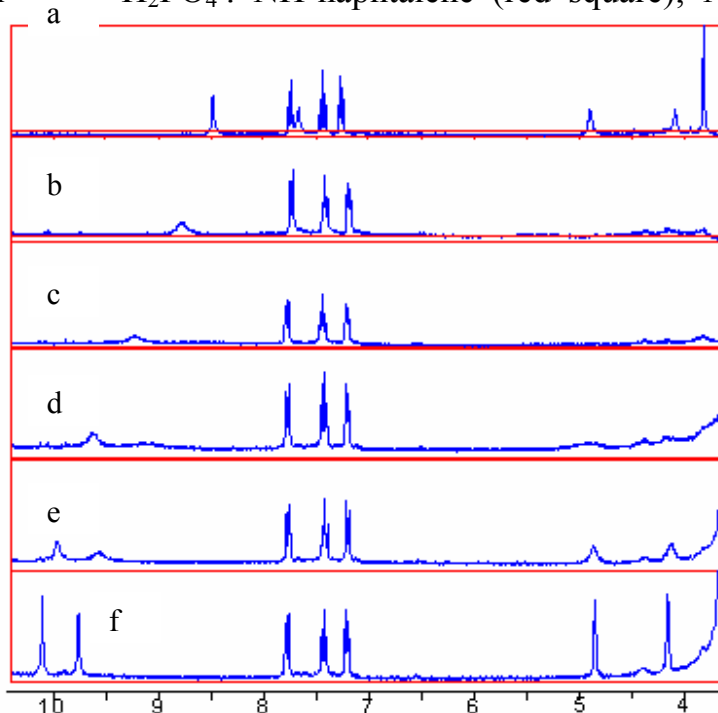

**Figure S6.** Evolution of the  $^1\text{H}$  NMR spectra of **1** upon addition of increasing amounts of  $\text{F}^-$  anion: (a) **1**; (b) **1** + 0.5 eq  $\text{F}^-$ ; (c) **1** + 1 eq  $\text{F}^-$ ; (d) **1** + 1.5 eq  $\text{F}^-$ ; (e) **1** + 2 eq  $\text{F}^-$ ; (f) **1** + 2.5 eq  $\text{F}^-$ .

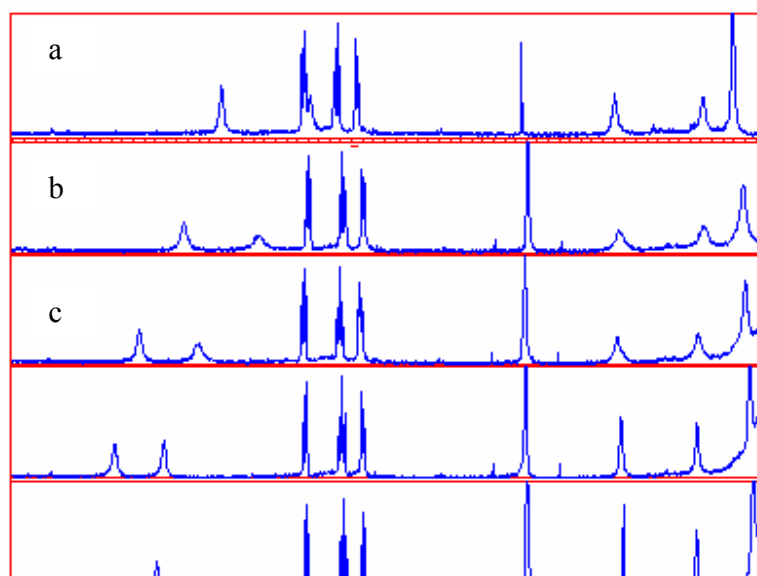

d

e

**Figure S7.** Evolution of the  $^1\text{H}$  NMR spectra of **1** upon addition of increasing amounts of  $\text{H}_2\text{PO}_4^-$  anion: (a) **1**; (b) **1** + 0.25 eq  $\text{H}_2\text{PO}_4^-$  ; (c) **1** + 0.5 eq  $\text{H}_2\text{PO}_4^-$  ; (d) **1** + 0.75 eq  $\text{H}_2\text{PO}_4^-$  ; (e) **1** + 1 eq  $\text{H}_2\text{PO}_4^-$  .

**References.-**

- 1.- For instance see: A. Tárraga, F. Otón, A. Espinosa, M.D. Velasco, P. Molina, D.J. Evans; *Chem. Commun.*, **2004**, 458-459.
